# Supplementary material for: Fractal growth of a fern-like nanostructured Cu2O film electrode for electrochemical reduction of CO2 to ethanol
Source: Royal Society of Chemistry journal article supplement (doi:10.1039/d3se01429k), 2024-01-01
Supplement: d3se01429k1.pdf [file d3se01429k1.pdf]

## Electronic Supporting Information (ESI)

### Fractal growth of fern-like nanostructured Cu<sub>2</sub>O film electrode for electrochemical reduction of CO<sub>2</sub> to ethanol

Deep Lata Singh,<sup>a</sup> Ramasamy Shanmugam,<sup>b</sup> Vineet Mishra,<sup>a</sup> and G. Ranga Rao<sup>a\*</sup>

<sup>a</sup>Department of Chemistry and DST Solar Energy Harnessing Centre (DSEHC), Indian Institute of Technology Madras, Chennai-600036, India

<sup>b</sup>Computational Insights and Sustainable Research Laboratory (CISRL), CO<sub>2</sub> Research and Green Technologies Centre, Vellore Institute of Technology, Vellore-632014, India

\*Corresponding Author Email: grrao@iitm.ac.in

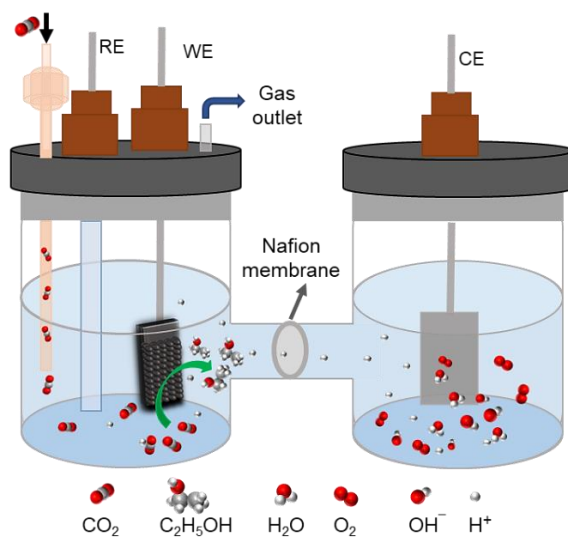

**Scheme S1.** Schematic diagram of the electrochemical setup (H-cell) used to carry out electrochemical CO<sub>2</sub> reduction.

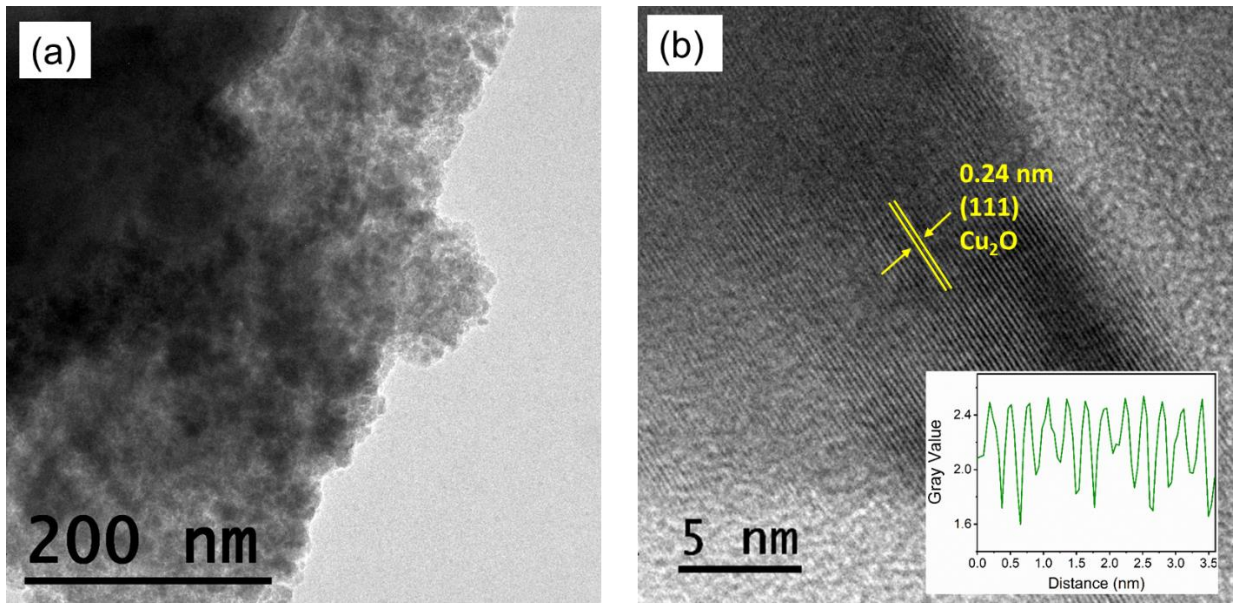

Figure S1. HR-TEM images of CuP3T5 at different magnifications.

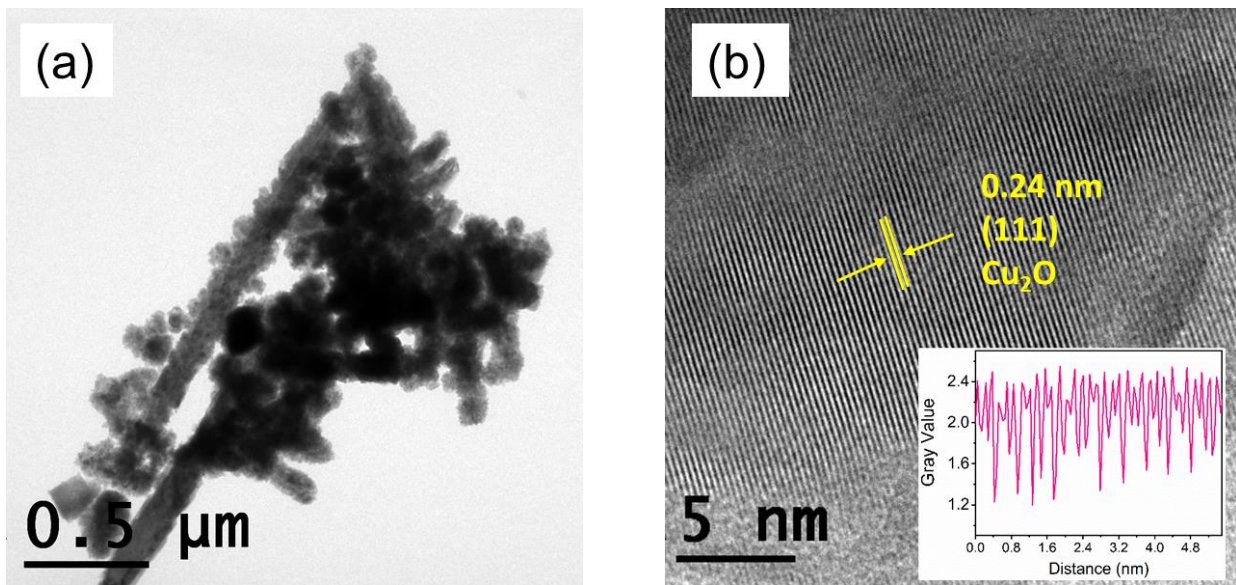

Figure S2. HR-TEM images of CuP5T5 at different magnifications.

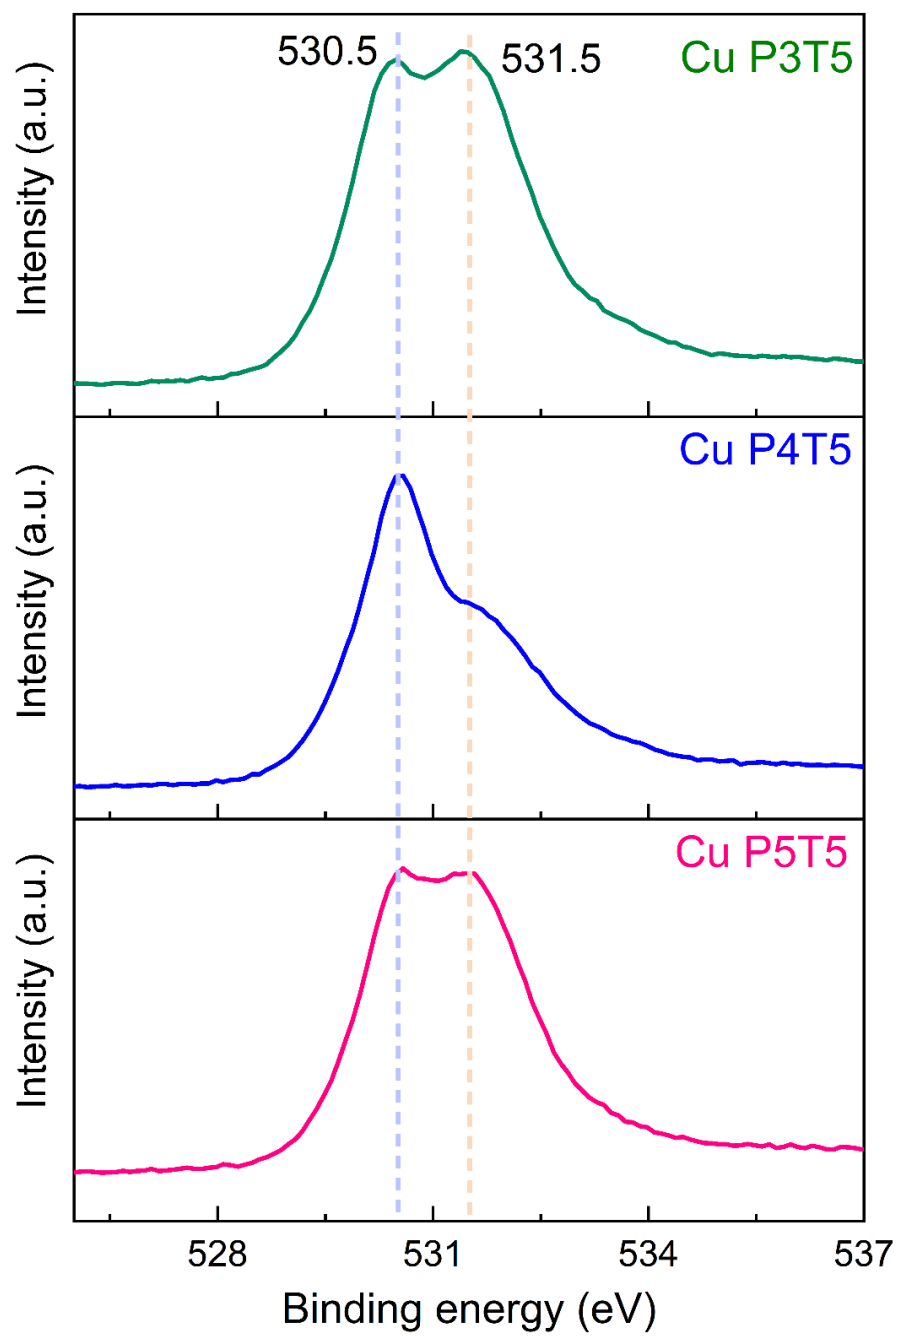

**Figure S3.** Core level O 1s XPS spectra of CuP3T5, CuP4T5 and CuP5T5 electrodes.

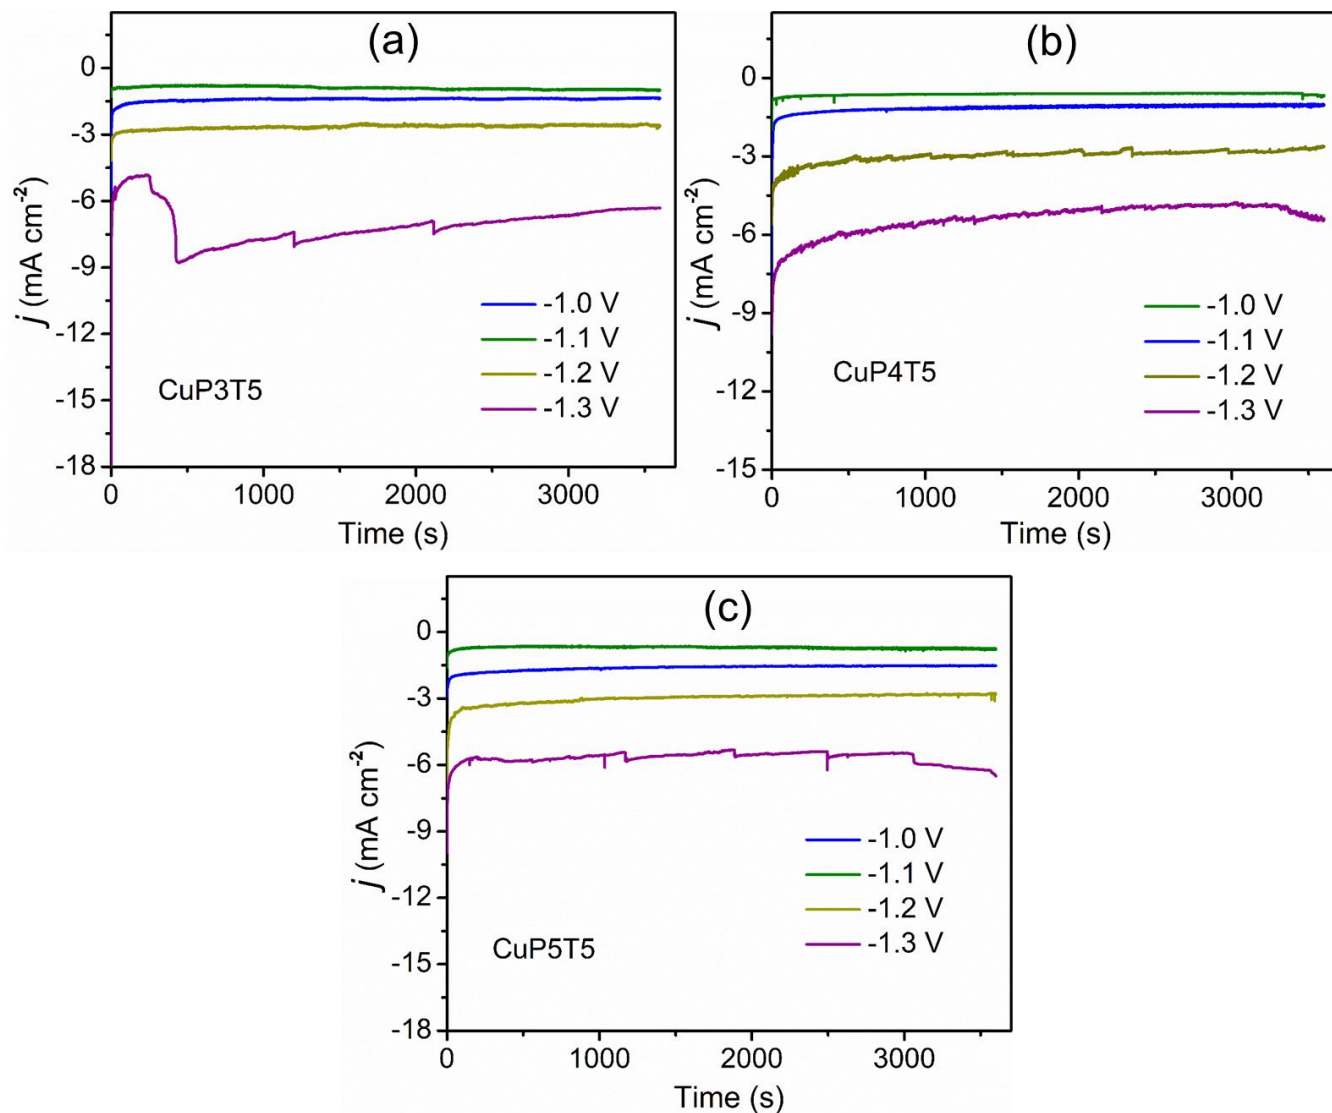

**Figure S4.** Chronoamperometry performances of CuP3T5, CuP4T5 and CuP5T5 film electrodes at the various applied potential of -1.0 to -1.3 V for 1 hour in  $\text{CO}_2$  saturated 0.1 M  $\text{KHCO}_3$  electrolyte.

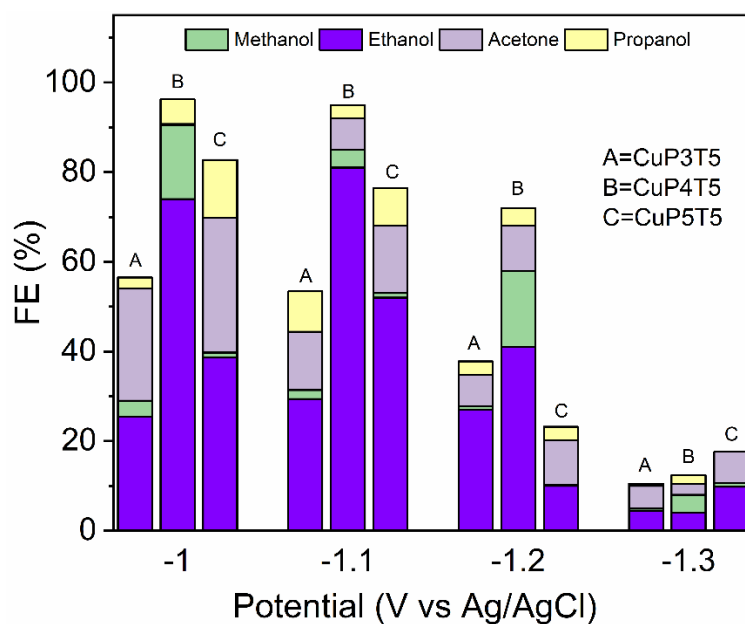

**Figure S5.** Faradaic efficiencies given by of CuP3T5, CuP4T5 and CuP5T5 film electrodes at the various applied potentials of -1.0 to -1.3 V in CO<sub>2</sub> saturated 0.1 M KHCO<sub>3</sub> electrolyte.

**Table S1.** Faradaic efficiencies obtained by applying 1h chronoamperometry.

| Electro-deposited Materials | Potential V vs Ag/AgCl | Faradaic Efficiencies (%) |          |         |          |
|-----------------------------|------------------------|---------------------------|----------|---------|----------|
|                             |                        | Ethanol                   | Methanol | Acetone | propanol |
| CuP3T5                      | -1.0                   | 25.5                      | 3.5      | 25      | 2.5      |
|                             | -1.1                   | 29.4                      | 2        | 13      | 9        |
|                             | -1.2                   | 27                        | 0.8      | 7       | 3        |
|                             | -1.3                   | 4.5                       | 0.5      | 5       | 0.5      |
| CuP4T5                      | -1.0                   | 74                        | 16.5     | 0.23    | 5.5      |
|                             | -1.1                   | 80                        | 4        | 7       | 3        |
|                             | -1.2                   | 41                        | 17       | 10      | 4        |
|                             | -1.3                   | 4                         | 4        | 2.4     | 2        |
| CuP5T5                      | -1.0                   | 38.6                      | 1.15     | 30      | 13       |
|                             | -1.1                   | 51                        | 1        | 15      | 8.5      |
|                             | -1.2                   | 10                        | 0.2      | 10      | 3        |
|                             | -1.3                   | 9.8                       | 0.8      | 7       | 0        |

Calculation of the Faradaic efficiency:

$$FE = \frac{n \times F \times C_i \times V_i}{j \times A \times t} \times 100$$

where, n is the number of electrons, F is the Faraday constant (96485, C/mol),  $C_i$  is the concentration of the product in mol/L,  $V_i$  is volume of the catholyte in L,  $j$ =total current density in A/cm<sup>2</sup>, A= area of the electrode in cm<sup>2</sup> and t is time in seconds.

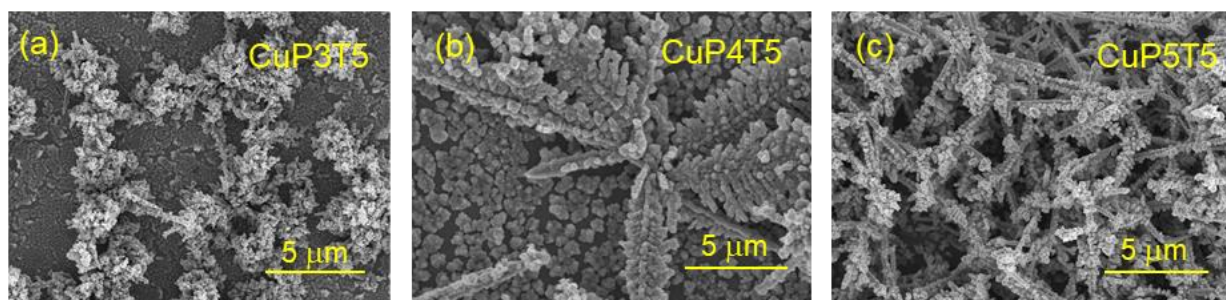

**Figure S6.** HR-SEM images of the film electrodes recorded after the electrochemical studies.



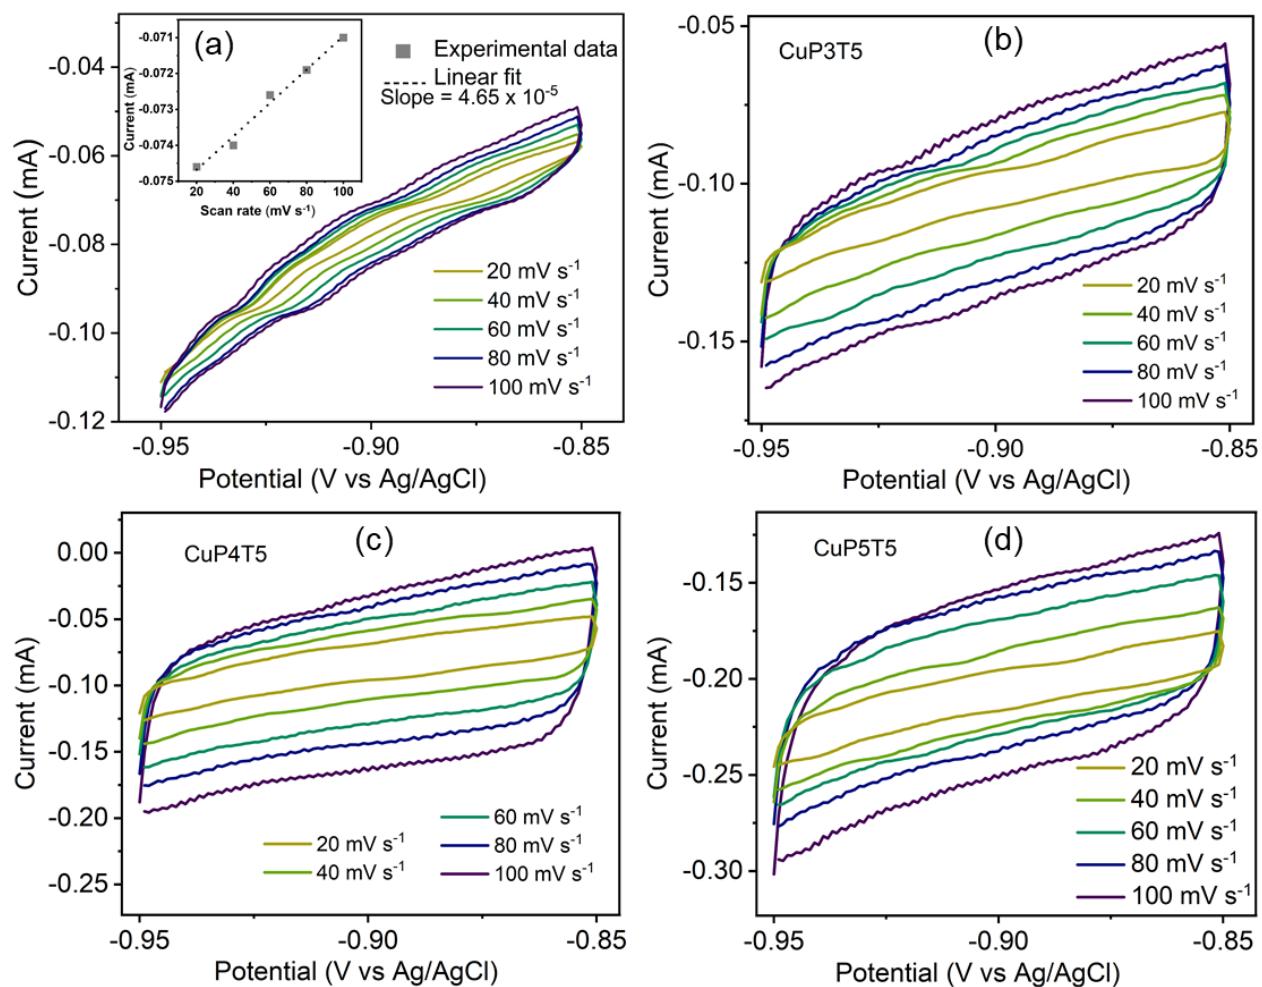

**Figure S7.** CV curves in the non-faradaic region at different scan rates of 20, 40, 60, 80 and 100  $\text{mV s}^{-1}$  for (a) bare SS-316 with fitted graph, (b) CuP3T5, (c) CuP4T5 and (d) CuP5T5 film electrodes in 0.1 M  $\text{KHCO}_3$  electrolyte.

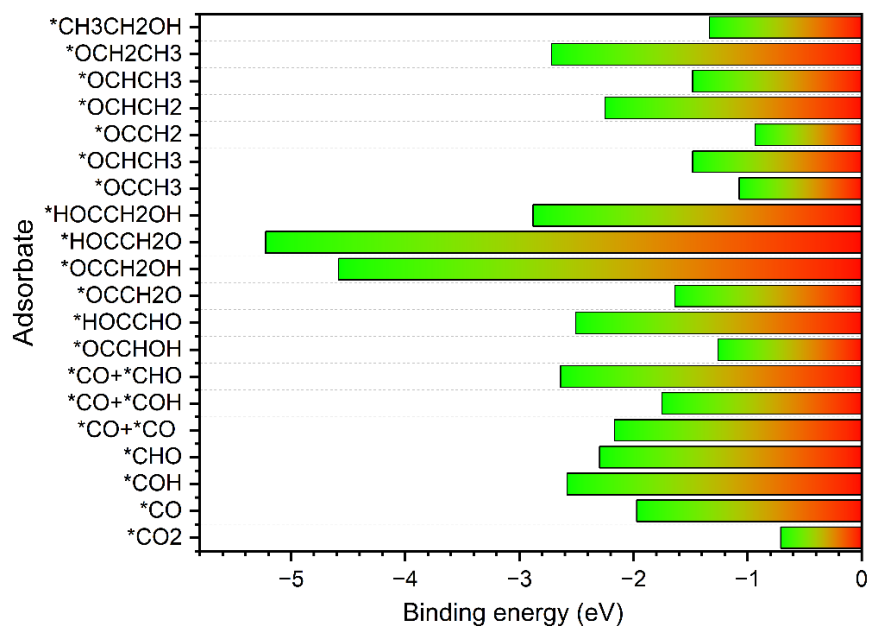

**Figure S8.** The adsorption binding energy of the intermediates on the surface of Cu<sub>2</sub>O(111).

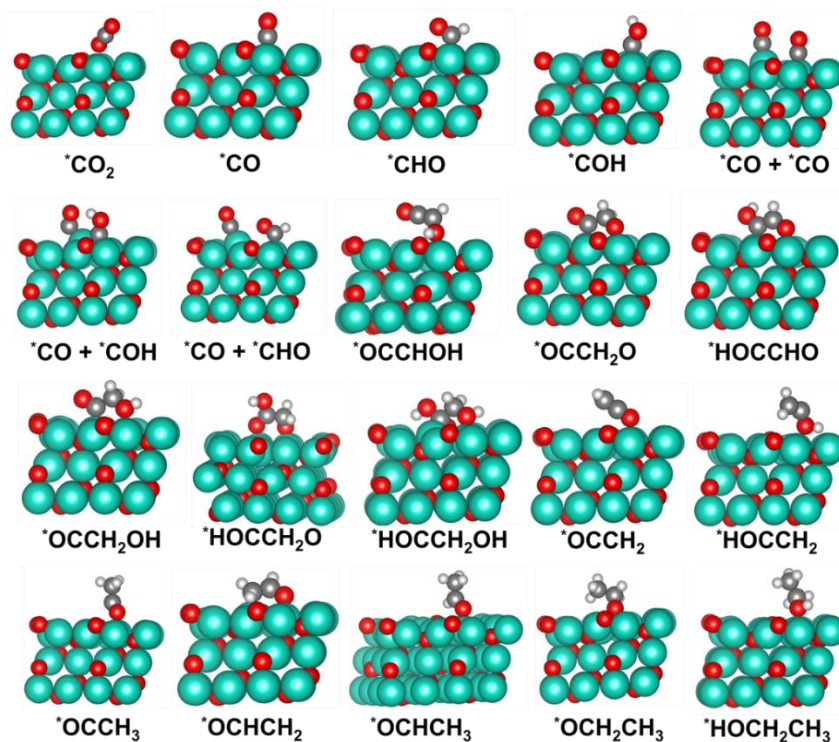

**Figure S9.** The energy-minimized structures that represent the different intermediates involved in the conversion of CO<sub>2</sub> to C<sub>2</sub>H<sub>5</sub>OH. The atoms are represented by the color codes Cu-cyan, O-red, C-grey, and H-white. Note: \*adsorbed intermediate.



**Table S2.** An overview of faradaic efficiencies reported using Cu<sub>2</sub>O based catalysts in electrochemical CO<sub>2</sub> reduction.

| Preparation method                                | Sample                                       | Substrate                                  | Electrolyte                          | Product, FE (%)                                                                                                                                                                                                                                                         | E vs RHE or (Ag/AgCl) | Ref.      |
|---------------------------------------------------|----------------------------------------------|--------------------------------------------|--------------------------------------|-------------------------------------------------------------------------------------------------------------------------------------------------------------------------------------------------------------------------------------------------------------------------|-----------------------|-----------|
| Galvanostatic deposition                          | Cu <sub>2</sub> O                            | Cu disc                                    | 0.1 M KHCO <sub>3</sub>              | C <sub>2</sub> H <sub>4</sub> , 40<br>C <sub>2</sub> H <sub>5</sub> OH, 16                                                                                                                                                                                              | -0.99                 | [1]       |
| Electrodeposition                                 | Cu <sub>2</sub> O inverse opals              | FTO film                                   | 0.1 M KHCO <sub>3</sub>              | CO, 45.3<br>HCOOH, 34.5                                                                                                                                                                                                                                                 | -0.6<br>-0.8          | [2]       |
| Wet chemical reduction method                     | Cu <sub>2</sub> O nanoparticles (NPs)        | Glassy carbon electrode                    | 0.5 M KHCO <sub>3</sub>              | C <sub>2</sub> H <sub>4</sub> , 59                                                                                                                                                                                                                                      | -1.1                  | [3]       |
| Electro-redeposition                              | Cu <sub>2</sub> (OH) <sub>3</sub> Cl sol-gel | Carbon paper                               | 0.1 M KHCO <sub>3</sub>              | C <sub>2</sub> H <sub>4</sub> , 38.5<br>CH <sub>4</sub> , 0.03                                                                                                                                                                                                          | -1.2                  | [4]       |
| Electrodeposition                                 | Cu <sub>2</sub> O-derived Cu NPs             | Cu plate                                   | 0.1 M KHCO <sub>3</sub>              | C <sub>2</sub> H <sub>4</sub> , 33.5<br>CH <sub>4</sub> , 4.0                                                                                                                                                                                                           | -1.1                  | [5]       |
| Electrodeposition                                 | Mesoporous Cu <sub>2</sub> O                 | Cu foam                                    | 0.5 M NaHCO <sub>3</sub>             | C <sub>2</sub> H <sub>4</sub> , 37                                                                                                                                                                                                                                      | -0.7                  | [6]       |
| One-pot wet-chemical                              | Cu <sub>2</sub> O NPs/C                      | Glassy carbon electrode                    | 0.1 M KHCO <sub>3</sub>              | C <sub>2</sub> H <sub>4</sub> , 57.3                                                                                                                                                                                                                                    | -1.1                  | [7]       |
| Precipitation                                     | multihollow Cu <sub>2</sub> O                | Hydrophobic carbon paper                   | 2 M KOH                              | C <sub>2</sub> H <sub>4</sub> , 38<br>CH <sub>3</sub> COOH, 4.8<br>C <sub>2</sub> H <sub>5</sub> OH, 26.9<br>C <sub>3</sub> H <sub>7</sub> OH, 5.5                                                                                                                      | -0.61                 | [8]       |
| Template-assisted hydrothermal synthesis process. | Cu <sub>2</sub> O-octahedral                 | Carbon paper                               | 0.5 M KHCO <sub>3</sub>              | CH <sub>3</sub> OH, 4.9<br>C <sub>2</sub> H <sub>5</sub> OH, 17.9<br>C <sub>3</sub> H <sub>8</sub> O, 12.6                                                                                                                                                              | -0.3                  | [9]       |
| In-situ etching methods                           | Cu <sub>2</sub> O@Cu-MOF                     | Glassy carbon electrode                    | 0.1 M KHCO <sub>3</sub>              | CO, 1.8<br>CH <sub>4</sub> , 63.2<br>C <sub>2</sub> H <sub>4</sub> , 16.2<br>HCOOH, 3.8<br>C <sub>2</sub> H <sub>5</sub> OH, 4.1                                                                                                                                        | -1.71                 | [10]      |
| Ion-track technology                              | Cu nanowire networks                         | Cu back electrode in touched with Cu plate | 0.1 M KHCO <sub>3</sub>              | CH <sub>4</sub> , ~0.3<br>C <sub>2</sub> H <sub>4</sub> , ~5<br>C <sub>2</sub> H <sub>6</sub> , ~2<br>C <sub>2</sub> H <sub>5</sub> OH, ~1.5<br>C <sub>3</sub> H <sub>7</sub> OH, ~3<br>C <sub>2</sub> H <sub>6</sub> O <sub>2</sub> , ~4<br>CH <sub>3</sub> COOH, ~0.3 | -0.83                 | [11]      |
| Combined Phase inversion/sintering                | Cu <sub>2</sub> O over Cu hollow fiber       | Copper tube                                | 0.5 M KHCO <sub>3</sub>              | HCOOH, 92.3                                                                                                                                                                                                                                                             | -1.18                 | [12]      |
| In-situ reconstructions                           | Cu/Cu <sub>2</sub> O nanoclusters            | --                                         | 0.1 M KHCO <sub>3</sub>              | C <sub>2</sub> H <sub>4</sub> , 70.2                                                                                                                                                                                                                                    | -1.03                 | [13]      |
| Wet chemical method                               | Cu/Cu <sub>2</sub> O nanocrystal             | Hydrophobic carbon paper                   | 0.1 M K <sub>2</sub> SO <sub>4</sub> | C <sub>2</sub> H <sub>4</sub> , 38<br>C <sub>2</sub> H <sub>5</sub> OH, 30                                                                                                                                                                                              | -2.0 vs Ag/AgCl       | [14]      |
| Electrodeposition                                 | Cu <sub>2</sub> O (CuP4T5)                   | Stainless steel-316                        | 0.1 M KHCO <sub>3</sub>              | C <sub>2</sub> H <sub>5</sub> OH, ~80<br>CH <sub>3</sub> OH, ~4<br>Acetone, ~7<br>Propanol, ~3                                                                                                                                                                          | -1.1 vs Ag/AgCl       | This work |

## References:

- 1 D. Ren, Y. Deng, A. D. Handoko, C. S. Chen, S. Malkhandi and B. S. Yeo, *ACS Catal.*, 2015, **5**, 2814–2821.
- 2 X. Zheng, J. Han, Y. Fu, Y. Deng, Y. Liu, Y. Yang, T. Wang and L. Zhang, *Nano Energy*, 2018, **48**, 93–100.
- 3 Y. Gao, Q. Wu, X. Liang, Z. Wang, Z. Zheng, P. Wang, Y. Liu, Y. Dai, M. H. Whangbo and B. Huang, *Adv. Sci.*, 2020, **7**, 1902820.
- 4 P. De Luna, R. Quintero-Bermudez, C. T. Dinh, M. B. Ross, O. S. Bushuyev, P. Todorović, T. Regier, S. O. Kelley, P. Yang and E. H. Sargent, *Nat. Catal.*, 2018, **1**, 103–110.
- 5 R. Kas, R. Kortlever, A. Milbrat, M. T. M. Koper, G. Mul, J. Baltrusaitis, *Phys. Chem. Chem. Phys.*, 2014, **16**, 12194–12201.
- 6 A. Dutta, M. Rahaman, N. C. Luedi, M. Mohos and P. Broekmann, *ACS Catal.*, 2016, **6**, 3804–3814.
- 7 H. Jung, S. Y. Lee, C. W. Lee, M. K. Cho, D. H. Won, C. Kim, H. S. Oh, B. K. Min and Y. J. Hwang, *J. Am. Chem. Soc.*, 2019, **141**, 4624–4633.
- 8 P. P. Yang, X. L. Zhang, F. Y. Gao, Y. R. Zheng, Z. Z. Niu, X. Yu, R. Liu, Z. Z. Wu, S. Qin, L. P. Chi, Y. Duan, T. Ma, X. S. Zheng, J. F. Zhu, H. J. Wang, M. R. Gao and S. H. Yu, *J. Am. Chem. Soc.*, 2020, **142**, 6400–6408.
- 9 B. Liu, X. Yao, Z. Zhang, C. Li, J. Zhang, P. Wang, J. Zhao, Y. Guo, J. Sun and C. Zhao, *ACS Appl. Mater. Interfaces*, 2021, **13**, 39165–39177.
- 10 X. Tan, C. Yu, C. Zhao, H. Huang, X. Yao, X. Han, W. Guo, S. Cui, H. Huang and J. Qiu, *ACS Appl. Mater. Interfaces*, 2019, **11**, 9904–9910.
- 11 N. Ulrich, M. Schäfer, M. Römer, S. D. Straub, S. Zhang, J. Brötz, C. Trautmann, C. Scheu, B. J. M. Etzold and M. E. Toimil-Molares, *ACS Appl. Nano Mater.*, 2023, **6**, 4190–4200.
- 12 G. Li, Y. Song, C. Zhu, X. Dong, W. Chen, G. Wu, G. Feng, S. Li and W. Wei, *J. CO<sub>2</sub> Util.*, 2023, **70**, 102446.
- 13 C. Liu, X. D. Zhang, J. M. Huang, M. X. Guan, M. Xu and Z. Y. Gu, *ACS Catal.*, 2022, **12**, 15230–15240.
- 14 Y. Yang, Z. Tan, S. Wang, Y. Wang, J. Hu, Z. Su, Y. Zhao, J. Tai and J. Zhang, *Chem. Commun.*, 2023, **59**, 2445–2448.
